# Supplementary material for: An 18 year data-linkage study on the association between air pollution and acute limb ischaemia
Source: Atypon-hosted journal article supplement (doi:10.1024/0301-1526/a000972), 2021-11-01
Supplement: 0301-1526_a000972_esm1.pdf [file 0301-1526_a000972_esm1.pdf]

## Electronic Supplementary Material

**ESM 1.** Table of ICD10 codes used over the study period and descriptions. ICD10 codes did not change through the updated versions of ICD10, and so these codes are valid for each reiteration (2000-2106)

| ICD10 code                         | Definition                                                         |
|------------------------------------|--------------------------------------------------------------------|
| I702                               | Atherosclerosis of arteries of extremities                         |
| I739                               | Peripheral vascular disease, unspecified                           |
| I74                                | Arterial embolism and thrombosis                                   |
| <b>I74 includes the following:</b> |                                                                    |
| I740                               | Embolism and thrombosis of abdominal aorta                         |
| I741                               | Embolism and thrombosis of other<br>and unspecified parts of aorta |
| I742                               | Embolism and thrombosis of arteries of upper extremities           |
| I743                               | Embolism and thrombosis of arteries of lower extremities           |
| I744                               | Embolism and thrombosis of arteries of extremities,<br>unspecified |
| I745                               | Embolism and thrombosis of iliac artery                            |
| I748                               | Embolism and thrombosis of other arteries                          |
| I749                               | Embolism and thrombosis of unspecified artery                      |
