# Supplementary material for: An 18 year data-linkage study on the association between air pollution and acute limb ischaemia
Source: Atypon-hosted journal article supplement (doi:10.1024/0301-1526/a000972), 2021-11-01

## Electronic Supplementary Material

ESM 2. Map of Scotland districts. Dundee city, Perth city, Milnfield and Leuchars stations are marked

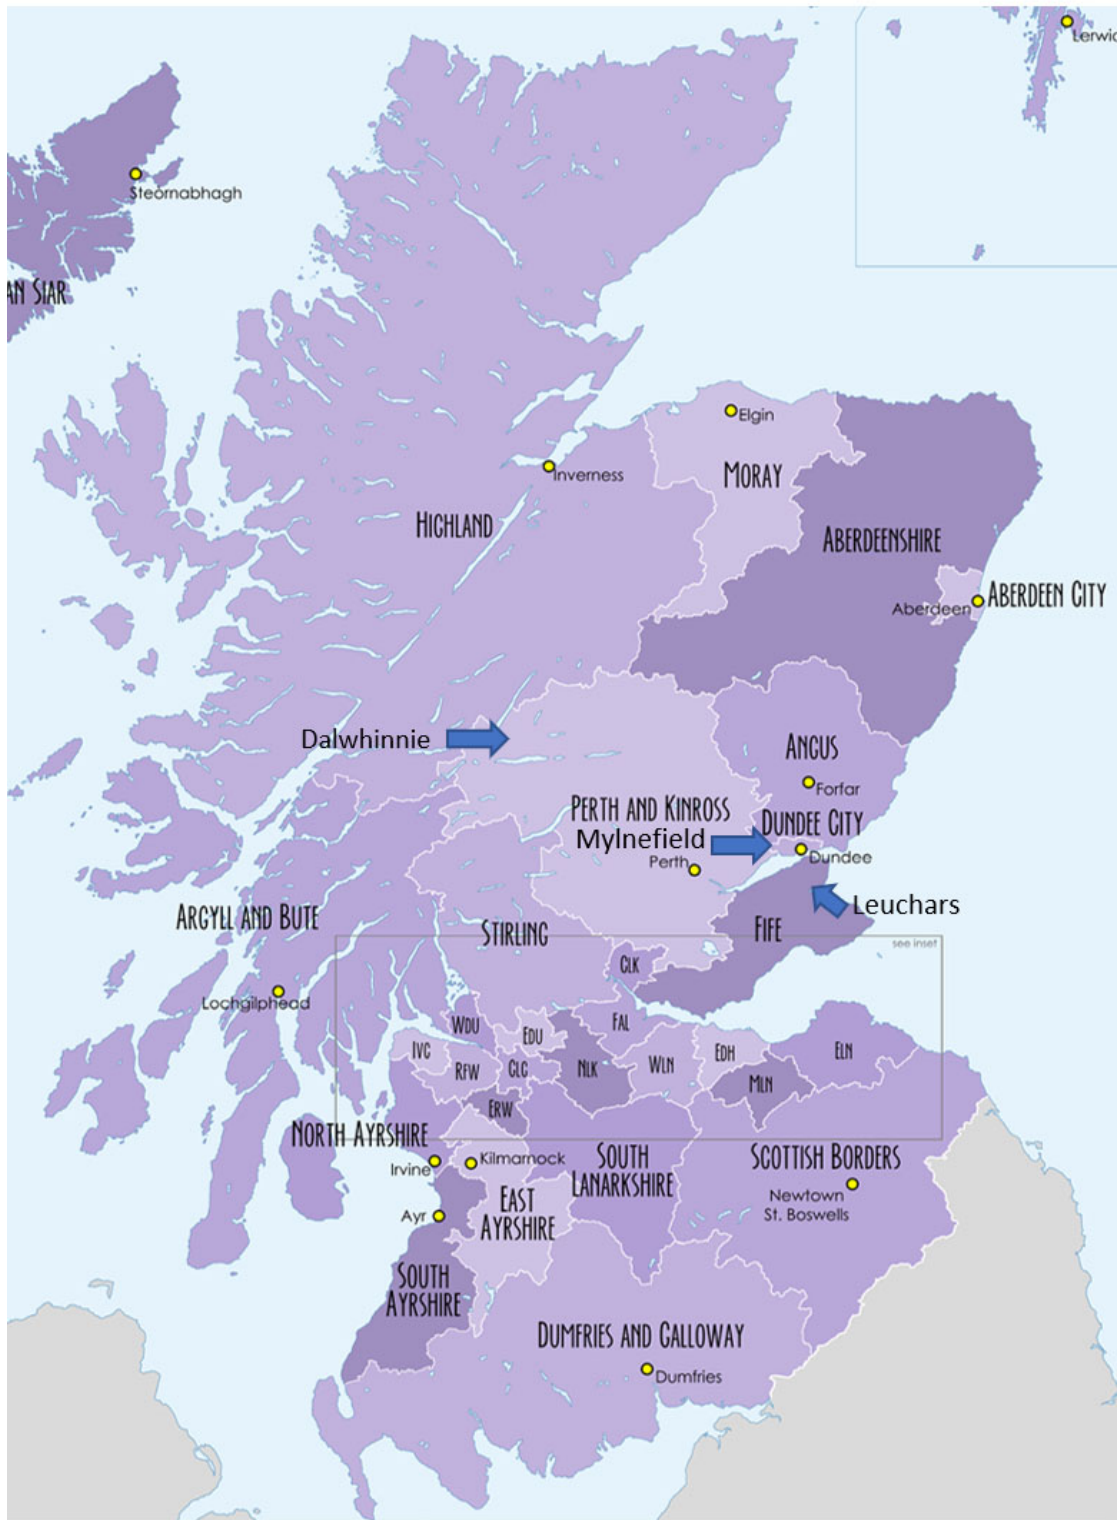

Supplement: 0301-1526_a000972_esm2.pdf [file 0301-1526_a000972_esm2.pdf]
