# Supplementary material for: An 18 year data-linkage study on the association between air pollution and acute limb ischaemia
Source: Atypon-hosted journal article supplement (doi:10.1024/0301-1526/a000972), 2021-11-01

## Electronic Supplementary Material

ESM 3. Dundee postcode districts, with city centre marked. DD1, DD2, DD3, DD4, DD5, DD6 and DD7 were used in this study

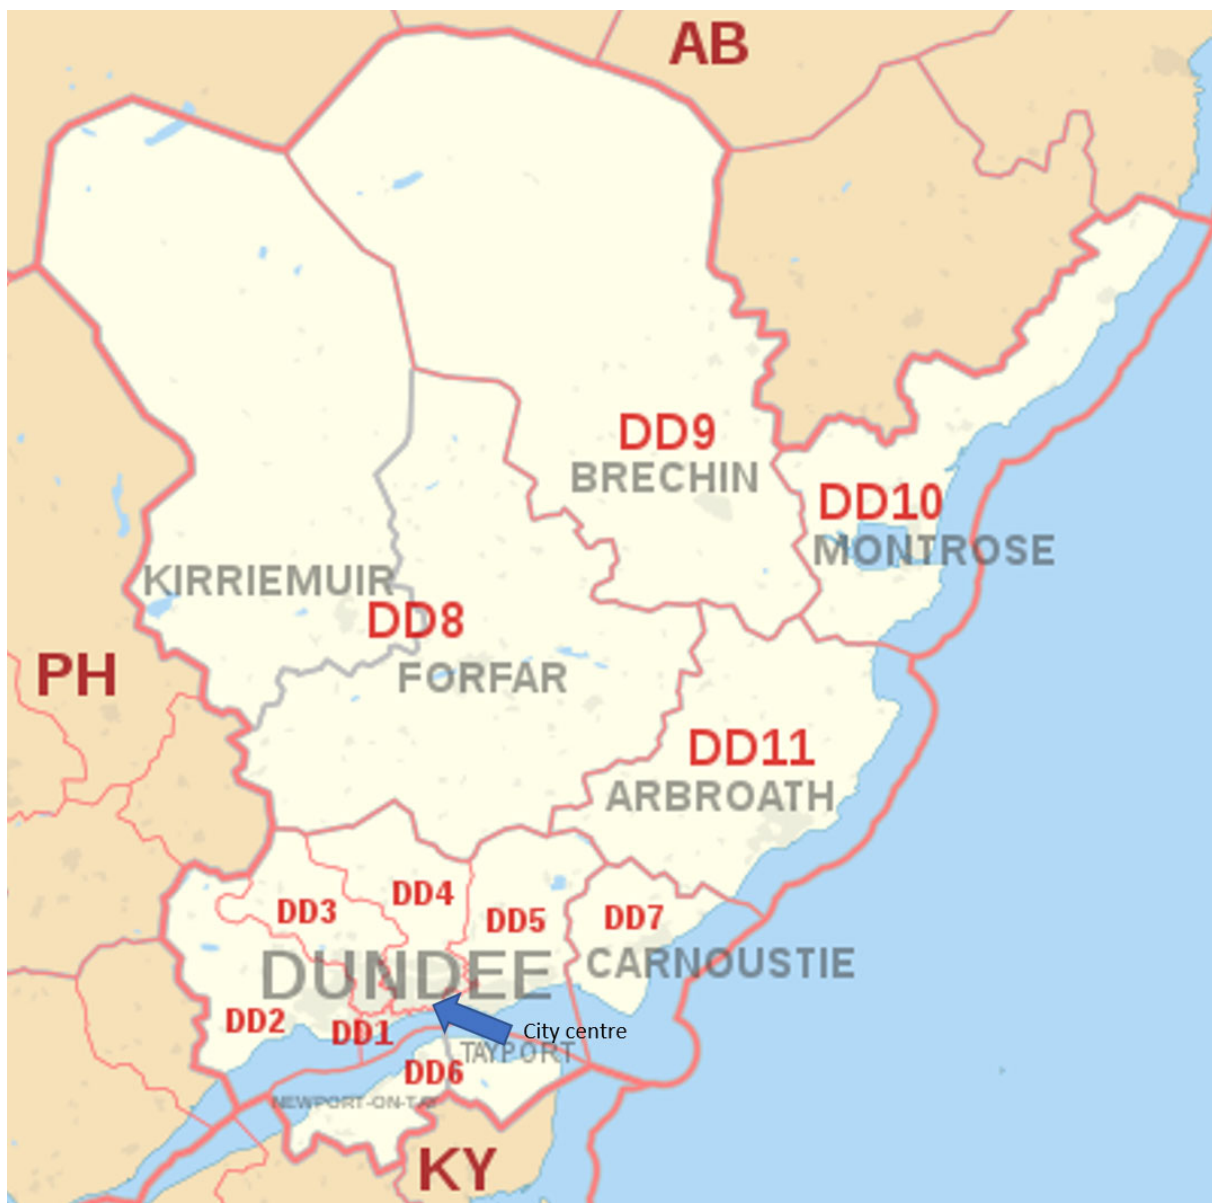

Supplement: 0301-1526_a000972_esm3.pdf [file 0301-1526_a000972_esm3.pdf]
