# Supplementary material for: An 18 year data-linkage study on the association between air pollution and acute limb ischaemia
Source: Atypon-hosted journal article supplement (doi:10.1024/0301-1526/a000972), 2021-11-01
Supplement: 0301-1526_a000972_esm5.pdf [file 0301-1526_a000972_esm5.pdf]

## Electronic Supplementary Material

**ESM 5.** Adjusted risk ratios with 95% confidence intervals at day 0 and cumulative risks (0-9 days) for acute limb ischaemia deaths and exposure to 10µg/m<sup>3</sup> increase in pollutants, and quartile 4 vs quartile 1

|                   | 10ugm/3<br>RR (95% CI) | P value | Q4 vs Q1<br>RR (95% CI) | P value |
|-------------------|------------------------|---------|-------------------------|---------|
| <b>Day 0</b>      |                        |         |                         |         |
| PM10              | 0.960 (0.836-1.104)    | 0.788   | 1.003 (0.773-1.300)     | 0.984   |
| NOX               | 1.009 (0.986-1.033)    | 0.460   | 1.233 (0.831-1.830)     | 0.302   |
| NO2               | 1.065 (0.947-1.199)    | 0.300   | 0.419 (0.121-1.452)     | 0.171   |
| NO                | 1.014 (0.970-1.059)    | 0.546   | 1.078 (0.719-1.616)     | 0.729   |
| <b>Cumulative</b> |                        |         |                         |         |
| PM10              | 1.020 (0.789-1.319)    | 0.889   | 0.981 (0.461-2.086)     | 0.964   |
| NOX               | 1.001 (0.949-1.055)    | 0.973   | 1.022 (0.259-4.037)     | 0.978   |
| NO2               | 0.928 (0.707-1.219)    | 0.603   | 1.182 (0.813-1.718)     | 0.388   |
| NO                | 1.018 (0.925-1.121)    | 0.729   | 0.932 (0.229-3.791)     | 0.928   |

Models adjusted for day of week, month, public holiday, daily temperature and humidity. PM10: particulate matter with a diameter smaller than 10 µm; NOx: nitrogen oxides; NO2: Nitric Oxide; NO: Nitrous Oxide.
